# Supplementary material for: The population genomics of archaeological transition in west Iberia: Investigation of ancient substructure using imputation and haplotype-based methods
Source: PLoS Genet. 2017 Jul 27;13(7):e1006852. doi: 10.1371/journal.pgen.1006852 (PMC5531429; doi:10.1371/journal.pgen.1006852)
Supplement: S7 Table — (XLSX) [file pgen.1006852.s015.xlsx]

## Sheet: S7 Table - List of imputed samp
S7 Table - List of ancient samples selected for genotype imputation.
	Archaeological Information			Sample Information
Current Study ID	Country	Site	Archaeological Period	Data Type	WGS Coverage (Approx)	Capture Coverage (Approx)	Sex	Finestructure Cluster
Anatolian_Bar31	Turkey	Barcin Hoyuk	Early Neolithic	WGS	3.71		M	Aegean Neolithic and Central LBK
Anatolian_Bar8	Turkey	Barcin Hoyuk	Early Neolithic	WGS	7.21		F	Aegean Neolithic and Central LBK
Klei10	Greece	Kleitos	Late Neolithic	WGS	3.25		M	Aegean Neolithic and Central LBK
NE6_LBK	Hungary	Apc-Berekalya I	Early Neolithic	WGS/SNP Capture	0.97	5.246	M	Aegean Neolithic and Central LBK
Pal7	Greece	Paliambela	Late Neolithic	WGS	1.29		F	Aegean Neolithic and Central LBK
Rev5	Greece	Revenia	Early Neolithic	WGS	1.17		F	Aegean Neolithic and Central LBK
Stuttgart_LBK	Germany	Viesenhaeuser Hof, Stuttgart-Muehlhausen	Early Neolithic	WGS	15.75		F	Aegean Neolithic and Central LBK
ATP12-1420	Spain	El Portalón, Sierra de Atapuerca	Chalcolithic	WGS	1.3		M	Atlantic Neolithic
ATP16	Spain	El Portalón, Sierra de Atapuerca	Chalcolithic	WGS	1.2		F	Atlantic Neolithic
ATP2	Spain	El Portalón, Sierra de Atapuerca	Chalcolithic	WGS	4.35		M	Atlantic Neolithic
Ballynahatty	Ireland	Ballynahatty	Middle Neolithic	WGS	11.11		F	Atlantic Neolithic
CabecoArruda122A	Portugal	Cabeco Arruda	Late Neolithic	WGS	1.71		M	Atlantic Neolithic
CovaMoura364	Portugal	Cova Moura	Late Neolithic	WGS	0.76		M	Atlantic Neolithic
CovaMoura9B	Portugal	Cova Moura	Late Neolithic	WGS	2.56		F	Atlantic Neolithic
DolmenAnsiao96B	Portugal	Dolmen Ansiao	Late Neolithic	WGS	1.88		M	Atlantic Neolithic
TRB_Gok2	Sweden	Gökhem Parish, Vastergotland	Middle Neolithic	WGS	1.08		F	Atlantic Neolithic
LugarCanto41	Portugal	Lugar Canto	Middle Neolithic	WGS	1.05		F	Atlantic Neolithic
LugarCanto42	Portugal	Lugar Canto	Middle Neolithic	WGS	2.95		F	Atlantic Neolithic
LugarCanto44	Portugal	Lugar Canto	Middle Neolithic	WGS	1.98		F	Atlantic Neolithic
BR2_Kyjatice	Hungary	Ludas-Varju-Dulo	Bronze Age	WGS/SNP Capture	18	1.332	M	Hungarian Bronze Age
Vatya_Erd4	Hungary	Erd 4	Bronze Age	WGS	1.23		M	Hungarian Bronze Age
Cardial_EN1	Spain	Cova Bonica	Early Neolithic	WGS	0.98		F	Hungarian Neolithic and Spanish Cardial
CO1_Badden	Hungary	Apc-Berekalya I	Chalcolithic	WGS/SNP Capture	0.91	4.563	F	Hungarian Neolithic and Spanish Cardial
NE1_ALP	Hungary	Polgar Ferenci hat	Early Neolithic	WGS/SNP Capture	18	1.517	F	Hungarian Neolithic and Spanish Cardial
NE7_Lengyel	Hungary	Apc-Berekalya I	Early Neolithic	WGS/SNP Capture	0.94	4.853	M	Hungarian Neolithic and Spanish Cardial
Karasuk_By3	Russia	Bystrovka	Bronze Age	WGS	1.21		F	Individual Karasuk I
Karasuk_Arb3	Russia	Arban 1	Bronze Age	WGS	7.35		F	Individual Karasuk II
6DRIF-18	Britain	Driffield Terrace, York	Iron Age	WGS	1.07		M	North Western and Central European
6DRIF-21	Britain	Driffield Terrace, York	Iron Age	WGS	1.16		M	North Western and Central European
6DRIF-22	Britain	Driffield Terrace, York	Iron Age	WGS	1.12		M	North Western and Central European
6DRIF-3	Britain	Driffield Terrace, York	Iron Age	WGS	1.67		M	North Western and Central European
NO3423	Britain	Norton on Tees, York	Medieval	WGS	1.05		M	North Western and Central European
Rathlin1	Ireland	Rathlin	Bronze Age	WGS	11.35		M	North Western and Central European
Rathlin2	Ireland	Rathlin	Bronze Age	WGS	1.61		M	North Western and Central European
Unetice_Prz1	Poland	Przeclawice	Bronze Age	WGS	2.83		F	North Western and Central European
Nordic_IA1	Sweden	Oxie 7	Iron Age	WGS	2.67		M	North Western and Central European
BB_Bra1	Czech Republic	Brandysek	Chalcolithic	WGS	0.87		F	North Western and Central European
Unetice_Vel1	Czech Republic	Velke Prilepy	Bronze Age	WGS	0.91		F	North Western and Central European
Nordic_LN	Scandinavia	L Beddinge 56	Late Neolithic	WGS	5.35		M	North Western and Central European
MonteGato104	Portugal	Monte Gato	Bronze Age	WGS	1.18		M	Portuguese Bronze Age
TV32032extra	Portugal	Torre Velha 3	Bronze Age	WGS	0.75		M	Portuguese Bronze Age
TV3831	Portugal	Torre Velha 3	Bronze Age	WGS	0.86		M	Portuguese Bronze Age
3DRIF-26	Britain	Driffield Terrace, York	Iron Age	WGS	1.13		M	Roman Outlier
Karasuk_Sab1	Russia	Sabinka 2	Bronze Age	WGS	6.67		M	Russian IA and Karasuk
Karasuk_Arb1	Russia	Arban 1	Bronze Age	WGS	3.61		M	Russian IA and Karasuk
Russia_IA2	Russia	Verh-Ulmon	Iron Age	WGS	1.13		M	Russian IA and Karasuk
Russia_IA3	Russia	Sary-Bel	Iron Age	WGS	1.24		M	Russian IA and Karasuk
Russia_IA1	Russia	Kytmanovo	Iron Age	WGS	1.33		M	Russian IA Individual
Karasuk_Arb2	Russia	Arban 1	Bronze Age	WGS	2.52		F	Russian Late Bronze Age
Karasuk_By1	Russia	Bystrovka	Bronze Age	WGS	1.35		F	Russian Late Bronze Age
Mezhovskaya_Kap1	Russia	Kapova Cave	Bronze Age	WGS	2.34		F	Russian Late Bronze Age
PWC_Ajv58	Sweden	Gotland Island	Middle Neolithic	WGS	2.14		M	Scandinavian HG
Kotias	Georgia	Kotias Klde	Mesolithic	WGS	15.4		M	Scandinavian HG
Motala12	Sweden	Motala	Mesolithic	WGS/SNP Capture	2.15	4.391	M	Scandinavian HG
Satsurblia	Georgia	Satsurblia	Palaeolithic	WGS	1.4		M	Scandinavian HG
IR1	Hungary	Ludas-Varju-dulo	Iron Age	WGS	1.08		M	Sintashta, Andronovo and Hungarian Iron Age
Sintashta_Bol1	Russia	Bol'shekaraganskii	Bronze Age	WGS	2.43		F	Sintashta, Andronovo and Hungarian Iron Age
Andronovo_Kyt1	Russia	Kytmanovo	Bronze Age	WGS	1.49		F	Sintashta, Andronovo and Hungarian Iron Age
Andronovo_Kyt2	Russia	Kytmanovo	Bronze Age	WGS	4.69		F	Sintashta, Andronovo and Hungarian Iron Age
Oetzi	Austrian-Italian Border	Tisenjoch	Chalcolithic	WGS	5.91		M	Tyrolean Iceman
Bichon	Switzerland	Bichon	Palaeolithic	WGS	9.5		M	Western HG I
Loschbour	Luxembourg	Echternach	Mesolithic	WGS	17.37		M	Western HG I
KO1	Hungary	Tiszaszolos-Domahaza	Early Neolithic	WGS/SNP Capture	1.05	5.103	M	Western HG II
LaBrana	Spain	La Braña-Arintero	Mesolithic	WGS/SNP Capture	3.13	19.536	M	Western HG II
Afanasievo_Bat1	Russia	Bateni	Chalcolithic	WGS	3.18		F	Yamnaya and Afanasievo
Yamnaya_Kal1	Russia	Temrta IV	Bronze Age	WGS	0.94		M	Yamnaya and Afanasievo
Yamnaya_Kal2	Russia	Ulan IV	Bronze Age	WGS	2.53		M	Yamnaya and Afanasievo
