# Supplementary material for: The population genomics of archaeological transition in west Iberia: Investigation of ancient substructure using imputation and haplotype-based methods
Source: PLoS Genet. 2017 Jul 27;13(7):e1006852. doi: 10.1371/journal.pgen.1006852 (PMC5531429; doi:10.1371/journal.pgen.1006852)
Supplement: S8 Table — (XLSX) [file pgen.1006852.s016.xlsx]

## Sheet: Sheet1
Recipient	HUN_NE1	HUN_IR1	HUN_NE6	HUN_NE7	HUN_CO1	HUN_KO1	3DT26_Roman	6DT18_Roman	6DT21_Roman	6DT22_Roman	6DT3_Roman	HUN_BR2	ATP12-1420_Chalcolithic-Pre-Beaker	ATP16_Chalcolithic-Pre-Beaker	ATP2_Chalcolithic-Pre-Beaker	Ajv58_PWC_Hunter_Gatherer	BA64_Middle_Neolithic	Bichon_Palaeolithic	CB13_Early_Neolithic	CabecoArruda122A_Late_Neolithic	CovaMoura364_Late_Neolithic	CovaMoura9B_Late_Neolithic	DolmenAnsiao96B_Late_Neolithic	Gok2_Middle_Neolithic	KK1	LBK	LaBrana_Hunter_Gatherer1	Loschbour_Hunter_Gatherer	LugarCanto41_Middle_Neolithic	LugarCanto42_Middle_Neolithic	LugarCanto44_Middle_Neolithic	MonteGato104_Bronze	Motala1_Hunter_Gatherer2	NO3423_Anglo-Saxon	Otzi	RISE150	RISE174	RISE395	RISE47_NordicBronzeAge9	RISE493	RISE495	RISE496	RISE497	RISE499	RISE500	RISE502	RISE504	RISE505	RISE511
HUN_NE1	0	2035.82	2182.59	2149.34	2169.03	2053.85	2073.23	2051.42	2053.38	2068.15	2044.68	2089.68	2095.71	2099.33	2119.25	2029.35	2129.47	2010.84	2142.13	2109.67	2112.11	2115.5	2131	2124.74	2025.98	2167.74	2021.68	2029.46	2105.23	2108.71	2125.23	2120.32	2015.75	2054.37	2046.41	2055.53	2053.1	2014.46	2066.96	1963.36	1959.54	2008.59	1927.8	2008.76	2020.83	1978.87	1946.54	2037.17	1998.67
HUN_IR1	2062.95	0	2059.72	2071.03	2080.03	2087.73	2041.77	2085.37	2093.45	2087.72	2102.33	2085.67	2050.44	2061.96	2056.69	2089.04	2039.74	2067.46	2067.44	2034.67	2046.75	2046.49	2066.1	2055.7	2093.04	2071.53	2054.02	2058.19	2044.5	2054.94	2069.86	2078.1	2094.6	2092.69	1982.47	2108.81	2109	2077.17	2085.1	2075.96	2082.62	2089.63	2054.31	2117.54	2110.38	2105.13	2075.31	2122.23	2102.55
HUN_NE6	2181.78	2037.48	0	2154.65	2157.24	2015.04	2070.39	2046.75	2044.55	2066.54	2046.1	2099.76	2118.19	2124.71	2129.55	2003.54	2126.6	1979.6	2157.09	2125.75	2114.8	2124.23	2117.51	2131.1	1999.61	2174.37	1970.63	2002.84	2130.26	2154.46	2119.02	2102.41	1987.58	2048.26	2055.29	2057.9	2053.01	2041.85	2079.07	1961.43	1949.43	1991.41	1902.13	2016.6	2028.67	1990.04	1952.25	2027.45	1992.78
HUN_NE7	2151.2	2045.29	2155.02	0	2160.36	2054.13	2065.08	2042.95	2070.39	2056.5	2065.95	2101.53	2115.27	2124.57	2148.81	2031.27	2127.26	2043.09	2142.07	2104.51	2123.43	2106.44	2133.02	2130.41	2025.86	2187.66	2022.18	2031.51	2112.26	2109.05	2091.53	2101.58	2020	2080.94	2045.78	2044.84	2063.13	2047.42	2090.64	1990.47	1976.27	2013.71	1935.47	2014.6	2039.29	1996.34	1982.55	2044.7	1982.01
HUN_CO1	2175.65	2068.06	2166.28	2163.78	0	2077.08	2083.91	2080.91	2076.23	2061.79	2069.26	2102.47	2121.55	2128.4	2143.39	2053.86	2123.46	2057.68	2156.12	2145.82	2105.11	2133.08	2108.38	2132.4	2029.73	2145.95	2050.1	2075.39	2128.25	2137.69	2127.03	2107.2	2042.62	2081.81	2042.97	2062.83	2064.72	2057.86	2082.35	2004.54	2006.15	2024.82	1935.86	2025.05	2057.2	1998.19	1965.61	2053.66	2015.72
HUN_KO1	2052.06	2066.08	2012.54	2049.77	2069.72	0	1974.36	2090.06	2078.71	2072.19	2084.14	2111.07	2112.22	2057.71	2108.1	2284.57	2093.56	2491.65	2055.04	2083.78	2102.23	2086.63	2092.44	2089.15	1970.6	2021.76	2368.18	2501.17	2107.35	2086.9	2102.18	2103.38	2322.27	2104.03	1960.87	2087.44	2093.17	2088.42	2175.94	2039.74	2040.18	2061.74	1958.85	2065.29	2084.23	2048.38	1993.67	2086.37	2074.62
3DT26_Roman	2183.03	2132.64	2173.31	2174.64	2178.2	2074.06	0	2139.07	2124.4	2125.33	2127.56	2148.89	2132.13	2148.52	2143.69	2078.62	2142.3	2048.49	2169.07	2149.07	2129.47	2153.69	2154.12	2141.25	2160.12	2189.88	2076.47	2043.88	2139.79	2166.8	2133.78	2147.8	2063.02	2148.18	2096.82	2127.8	2111.89	2091.49	2131.97	2100.73	2112.56	2103.21	2086.49	2118.05	2121.83	2122.67	2103.65	2120.56	2098.7
6DT18_Roman	2058.14	2071.87	2051.18	2050.42	2079.46	2095.47	2040.34	0	2103.49	2102.23	2110.85	2090.37	2061.65	2080.06	2098.51	2081.8	2083.23	2078.16	2069.04	2068.1	2068.24	2072.61	2078.15	2092.52	2066.95	2059.34	2074.32	2080.81	2085.66	2072.24	2085.83	2072.04	2111.83	2101.46	1992.75	2096.25	2110.28	2090.12	2099.57	2040.85	2040.4	2074.03	1992.37	2058.2	2107.18	2065.79	2004.81	2105.19	2082.69
6DT21_Roman	2059.43	2079.62	2054.29	2083.27	2078.75	2088	2028	2110.61	0	2086.66	2105.12	2087.29	2064.59	2079.04	2072.22	2073.36	2057.48	2103.8	2051.78	2072.81	2066.59	2061.69	2059.48	2070.48	2069.47	2072	2078.37	2087.78	2084.15	2060.44	2051.12	2087.44	2083.16	2127.24	1986.54	2109.09	2120.05	2097.91	2079.84	2045.74	2038.64	2089.73	1980.02	2090.23	2082.33	2056.01	1996.25	2099.6	2119.37
6DT22_Roman	2073.82	2072.1	2073.9	2062.35	2060.45	2079.2	2025.23	2103.49	2081.75	0	2121.33	2070.21	2053.34	2079.2	2081.96	2085.74	2084.46	2091.5	2086.7	2078.02	2089.58	2073.9	2082.38	2064.37	2047	2065.31	2071.67	2088.68	2070.96	2071.9	2072.4	2085.26	2105.94	2104.12	1966.66	2106.47	2102.48	2079.42	2093.3	2033.75	2038.45	2072.43	1974.54	2075.34	2089.73	2042.21	2007.84	2100.46	2095.27
6DT3_Roman	2053.2	2081.44	2055.45	2073.29	2069.37	2095.58	2024.74	2118.27	2108.08	2125.15	0	2081.47	2073.95	2068.13	2065.27	2077.26	2069.94	2097.38	2077.09	2070.31	2051.38	2067.82	2077.22	2073.01	2068.54	2052.35	2072.73	2080.11	2078.83	2064.35	2057.07	2084.41	2110.61	2109.62	1999.15	2114.96	2122.81	2092.31	2099.48	2044.6	2050.55	2091.29	1983.96	2089.98	2114.08	2031.73	2018.54	2116.07	2106.67
HUN_BR2	2095.59	2071.21	2106.9	2109.67	2107.61	2121.77	2054.85	2101.58	2086.21	2074.17	2081.5	0	2075.48	2073.12	2102.08	2086.2	2066.18	2093.37	2088.94	2090.35	2093.6	2075.18	2076.57	2100.38	2046.34	2096.38	2080.29	2089.03	2090.76	2085.93	2095.04	2081.21	2105.39	2093.2	2008.53	2092.02	2100.04	2063.8	2154.67	2018.46	2021.79	2078.78	1963.65	2073.37	2074.81	2031.06	1996.9	2063.27	2073.29
ATP12-1420_Chalcolithic-Pre-Beaker	2106.97	2041.45	2130.11	2127.76	2129.2	2127.31	2046.19	2071.48	2066.97	2062.43	2078.92	2080.56	0	2152.38	2184.83	2078.69	2148.8	2148.8	2165.61	2172.7	2176.54	2170.72	2180.06	2154.02	1997.87	2120.35	2135.53	2136.92	2200.35	2176.26	2147.95	2152.4	2082.75	2090.53	2054.28	2058.88	2050.5	2043.8	2119.55	1984.57	1983.28	2036.56	1924.35	2020.48	2059.9	1988.28	1966.47	2047.11	2005.64
ATP16_Chalcolithic-Pre-Beaker	2100.19	2049.25	2125.16	2127.05	2129.04	2063.03	2049.84	2082.64	2075.43	2079.31	2065.65	2075.19	2148.48	0	2170.69	2059.25	2149.23	2091.53	2201.64	2153.12	2146.31	2181.91	2175.47	2113.82	2017.75	2123.29	2072.73	2078.36	2182.8	2153.92	2164.51	2119.42	2035.55	2057	2060.63	2054.13	2046.57	2027.93	2070.98	1977.73	1984.05	1985.33	1929.58	2007.69	2048.66	1998.09	1957.62	2041.77	2000.41
ATP2_Chalcolithic-Pre-Beaker	2119.05	2040.61	2125.09	2149.6	2143.27	2112.27	2041.49	2093.47	2063.89	2074.53	2059.34	2096.53	2175.28	2164.83	0	2074.32	2140.26	2129.14	2160.12	2173.5	2164.55	2153.42	2158.42	2133.39	1993.92	2133.5	2115.59	2129.64	2165.34	2155.94	2140.67	2142.25	2054.97	2059.04	2027.94	2034.53	2073.11	2029.53	2085.64	1958.5	1978.64	2013.16	1929.69	2023.75	2038.56	2005.2	1964.03	2027.34	1994.85
Ajv58_PWC_Hunter_Gatherer	2035.86	2076.42	2009.05	2038.07	2055.11	2299.38	1977.14	2085.68	2072.1	2085.38	2070.73	2086.53	2074.52	2061.34	2081.88	0	2055.34	2258.91	2052.95	2068.64	2073.56	2061.37	2093.69	2105.62	1989.78	2008.63	2232.24	2304.38	2075.59	2055.15	2077.46	2077.75	2416.14	2083.55	1954.5	2119.86	2105.68	2070.96	2130.39	2077.3	2052.67	2078.66	1997.14	2082.46	2093.14	2060.71	2013.31	2096.98	2106.43
BA64_Middle_Neolithic	2133.88	2019.37	2123.05	2127.18	2118.77	2092.52	2029.88	2080.86	2050.66	2081.9	2059.65	2057.28	2136.4	2142.69	2141.7	2048.89	0	2082.44	2157.61	2162.26	2135.94	2140.28	2127.35	2131.84	1999.74	2110.31	2063.81	2091.19	2139.87	2150.78	2161.14	2118.52	2031.72	2043.62	2029.77	2057.04	2068.71	2030.55	2068.59	1988.2	1975.64	1995.17	1932.1	2019.08	2024.1	2007.51	1963.71	2006.6	1994.72
Bichon_Palaeolithic	1995.44	2041.18	1963.9	2026.93	2039.6	2474.87	1927.82	2061.06	2082.46	2074.93	2072.82	2069.93	2121.67	2073.17	2116.9	2238.27	2068.22	0	2026.94	2089.57	2102.21	2079.81	2082.76	2079.07	1951.93	1978.45	2526.27	2691.12	2125.44	2084.1	2104.74	2087.15	2307.68	2060.96	1952.74	2050.14	2087.12	2044.26	2128.4	1998.63	2015.75	2031.74	1937.19	2044.67	2047	2029.14	1981.68	2070.78	2025.64
CB13_Early_Neolithic	2139.68	2047.72	2160.48	2140.58	2146.88	2051.61	2057.1	2067.91	2045.51	2086.03	2072.6	2080.06	2156.59	2199.99	2156.93	2046.21	2156.81	2040.45	0	2164.5	2141.08	2171.14	2159.19	2159.59	2017.18	2139.88	2021.79	2040.49	2149.45	2178.6	2169.22	2125.6	2010.41	2055.05	2069.5	2041.71	2066.3	2024.94	2065.27	1974.64	1978.34	2007.4	1929.6	2016.83	2026.67	2003.36	1965.61	2014.14	2001.38
CabecoArruda122A_Late_Neolithic	2106.72	2008.58	2118.18	2099.15	2130.08	2082.76	2035.97	2055.52	2058.17	2066.95	2055.36	2071.12	2154.95	2144.08	2168.53	2058.02	2153.95	2102.5	2163.46	0	2168.43	2144.61	2157.16	2116.6	1992.23	2114.56	2101.45	2117.78	2175.97	2155.68	2143.82	2116.4	2031.45	2057.68	2023.98	2033.7	2058.76	2010.87	2079.3	1963.37	1970.36	2013.02	1911.3	2005.87	2042.35	1996.33	1944.41	2023.13	1983.15
CovaMoura364_Late_Neolithic	2117.41	2032.67	2115.82	2123.27	2101.5	2106.12	2024.66	2062.36	2059.87	2082.86	2044.04	2086.41	2158.9	2138.99	2169.62	2072.67	2139.58	2114.9	2139.6	2174.34	0	2160.02	2155.56	2148.35	2011.85	2108.65	2103.58	2118.96	2150.37	2165.06	2167.51	2105.92	2048.7	2063.83	2030.95	2056.75	2049.79	2032.94	2082.32	1974.15	1975.42	2017.95	1917.45	2004.39	2031.03	1986.84	1951.64	2041.67	1998.48
CovaMoura9B_Late_Neolithic	2115.21	2021.41	2117.6	2098.4	2122.81	2078.47	2040.24	2061.52	2044.49	2060.5	2051.91	2058.98	2149.27	2170.05	2146.02	2050.92	2134.6	2086.66	2162.54	2142.61	2155.6	0	2152.26	2128.99	2004.47	2127.68	2095.58	2093.47	2162.4	2156.34	2171.44	2124.09	2030.29	2057.6	2040.27	2040.77	2060.89	2021.39	2075.09	1960.89	1972.02	1996.15	1915.48	2008.17	2044.82	1996.74	1960.69	2020.08	1989.02
DolmenAnsiao96B_Late_Neolithic	2137.22	2045.12	2118.69	2133.49	2100.07	2096.11	2050.29	2076.71	2051.29	2075.1	2069.57	2067.72	2163.35	2166.89	2158.38	2089.46	2123.66	2097.1	2161.68	2163.38	2161.53	2157.34	0	2133.47	1998	2112.11	2115.69	2105.11	2166.75	2170.87	2160.54	2126.88	2048.5	2062.84	2040.71	2062.82	2053.31	2029.37	2085.02	1986.23	1966.7	1999.37	1928.28	2011.44	2035.21	2007.94	1955.44	2023.8	1981.64
Gok2_Middle_Neolithic	2151.52	2054.75	2155.46	2160.58	2150.59	2118.04	2069.6	2115.38	2085.14	2084.39	2091.21	2121.27	2166.1	2134.27	2164.74	2128.32	2156.59	2113.76	2185.91	2147.49	2166.51	2157.38	2159.89	0	2024.04	2147.09	2097.62	2127.1	2185.43	2160.06	2145.12	2128.75	2099.5	2093.7	2064.49	2078.38	2086.99	2056.03	2091.83	2026.18	2013.27	2050.97	1954.45	2044.37	2076.18	2012.06	1985.68	2057.27	2021.24
KK1	2033.03	2090.78	2013.13	2038.83	2043.87	1983.95	2064.55	2078.44	2076.32	2058.68	2075.1	2054.53	2001.55	2030.69	2012.5	2000.7	2016.02	1974.52	2029.98	2012.27	2030.01	2028.2	2020.56	2016.46	0	2047.43	1967.17	1975.21	2036.33	2008.89	2017.77	2050.4	2010.66	2097.27	1961.18	2087.2	2076.25	2075.64	2030.7	2056.7	2051.47	2084.62	1993.99	2088.35	2080.38	2060.57	2050.32	2104.46	2155.02
LBK	2165.12	2050.32	2173.06	2181.48	2136.98	2022.8	2074.88	2052.33	2061.83	2054.62	2046.82	2077.47	2104.57	2119.75	2136.12	2004.82	2106.94	1984.94	2138.56	2118.18	2104.55	2130.9	2103.68	2123.22	2030.22	0	1977.32	1974.95	2116.69	2118.91	2099.17	2074.79	1994.49	2041.59	2050.34	2052	2046.35	2030.97	2072.29	1967.91	1969.03	1998.62	1914.89	1986.76	2034.07	1981.57	1961.38	2018.49	1984.38
LaBrana_Hunter_Gatherer1	2038.6	2046.95	1983.08	2034.81	2056.93	2390.72	1982.79	2083.76	2083.95	2081.04	2077.32	2088.45	2139.47	2083.24	2127.51	2243.06	2083.42	2558.31	2038.75	2123.16	2121.4	2116.47	2128.84	2087.15	1968.79	1991	0	2549.28	2163.04	2107.77	2136.43	2106.5	2291.31	2097.8	1962.97	2092.43	2100.61	2058.67	2142.62	2049.43	2054.46	2054.19	2001.31	2075.33	2073.39	2028.88	2031.89	2076.8	2054.77
Loschbour_Hunter_Gatherer	2024.65	2036.32	1993.06	2031.81	2073.17	2501.56	1935.91	2077.86	2076.54	2080.63	2068.76	2075.71	2120.2	2070.06	2127.73	2293.93	2088.48	2708.92	2036.12	2116.82	2113.08	2095.93	2100.93	2102.95	1957.68	1971.12	2531.13	0	2133.31	2088.23	2124.64	2091.44	2338.49	2092.76	1942.84	2087.26	2098.6	2068.02	2150.68	2005.49	2020.41	2042.26	1944.28	2053.95	2054.76	2029.09	1983.28	2074.81	2046.89
LugarCanto41_Middle_Neolithic	2106.45	2027.18	2128.71	2110.04	2120.57	2106	2030.36	2077.9	2074.54	2063.79	2062.9	2076.18	2183.77	2173.32	2155.5	2068.74	2133.09	2134.88	2149.93	2180.92	2145.88	2166.68	2164.73	2156.03	2019.87	2118.89	2141.69	2134.5	0	2147.85	2173.41	2118.29	2071.81	2060.57	2038.27	2043.77	2059.65	2025.22	2070.79	1973.09	1991.07	2006.69	1929.75	2022.15	2041.43	2006.09	1967.16	2037.67	1997.68
LugarCanto42_Middle_Neolithic	2103.09	2026.81	2147	2104.64	2124.83	2079.51	2047.24	2060.47	2047.74	2059.72	2050.89	2071.48	2157.72	2149.47	2148.36	2042.41	2139.87	2092.93	2173.78	2154.34	2158.83	2155.43	2162.26	2123.43	1988.62	2113.73	2089.81	2084.83	2149.33	0	2155.58	2105.34	2022.26	2067	2034.53	2054.71	2053.44	2013.76	2070.3	1970.93	1966.12	1985.73	1891.67	2011.23	2034.04	1982.41	1933.49	2008.99	1986.96
LugarCanto44_Middle_Neolithic	2115.68	2041.67	2114.92	2092.67	2120.11	2103.39	2017.08	2076.52	2035.21	2060	2044.74	2079.6	2131.6	2158.28	2132.53	2066.53	2155.22	2115.09	2164.94	2139.3	2159.31	2171.87	2155.17	2114.71	1995.61	2096.65	2113.74	2123.53	2173.48	2155.63	0	2106.98	2048.01	2057.31	2036.78	2052.21	2030.99	2032.51	2091.6	1976.61	1975.85	2007.23	1917.43	2019.31	2031.75	1989.49	1940.18	2027.97	2005.95
MonteGato104_Bronze	2136.11	2073.07	2119.25	2117.48	2120.87	2119.98	2059.05	2082.48	2092.33	2096.63	2093.1	2087.2	2154.71	2135.88	2156.55	2091.09	2135.07	2125.64	2142.4	2139.26	2118.25	2151.35	2146.58	2121.05	2048.21	2089.14	2108.86	2110.79	2135.88	2128.31	2127.72	0	2076.68	2094.79	2046.77	2083.21	2094.51	2053.97	2101.15	2001.66	2013.04	2042.28	1975.81	2055.68	2075.38	2020.1	2007.39	2073.3	2048.33
Motala1_Hunter_Gatherer2	2014.63	2071.31	1979.72	2017.99	2030.18	2320.62	1963.4	2106	2069.97	2095	2095.69	2095.13	2065.79	2028.09	2046.68	2396.26	2025.29	2321.81	2007.63	2033.01	2044.73	2031.45	2042.47	2071.34	1991.16	1995.24	2268.34	2335.03	2068.67	2025.17	2046.73	2055	0	2100.28	1931	2105.83	2118.2	2077.29	2122.06	2088.69	2075.87	2087.79	2022.66	2094.76	2091.78	2062.18	2021.73	2096.59	2120.71
NO3423_Anglo-Saxon	2069.31	2089.94	2057.96	2089.92	2086.7	2121.64	2053.21	2105.05	2132.54	2114.38	2116.62	2097.52	2091.28	2061.17	2073.96	2087.97	2056.89	2085.1	2067.85	2071.71	2072.47	2076.09	2070.52	2077.51	2087.21	2049.29	2094.11	2104.17	2072.34	2082.45	2073.42	2087.32	2118.06	0	1999.56	2124.91	2098.97	2099.9	2090.78	2052.54	2066.55	2095.11	1991.52	2089.34	2101.87	2077.05	2016.7	2118.25	2120.59
Otzi	2337.43	2235.84	2342.68	2328.33	2323.33	2228.2	2282.6	2255.6	2250.46	2235.08	2260.8	2276.77	2328.66	2332.42	2310.4	2212.51	2315.75	2227.39	2355.19	2302.79	2305.59	2323.43	2313.1	2315.53	2219.7	2335.98	2217.68	2202.92	2320.69	2312.11	2326.51	2306.13	2198.93	2261.52	0	2255.88	2249	2246.06	2257.27	2189.72	2184.65	2218.14	2153.88	2216.86	2229.35	2199.28	2184.58	2239.36	2195.8
RISE150	2056.1	2089.66	2058.29	2047.54	2053.12	2088.36	2019.17	2094.36	2102.27	2099.99	2106.53	2086.37	2049.22	2047.86	2033.02	2110.58	2055.71	2062.79	2039.16	2036.8	2054.64	2044.15	2060.74	2055	2070.34	2053.99	2070.23	2089.11	2043.09	2057.4	2063.56	2070.75	2113.98	2112.41	1990.26	0	2115.26	2100.54	2071.5	2049.61	2055.14	2095.45	1993.49	2094.59	2111.68	2057.6	2022.83	2110.16	2127.34
RISE174	2059.07	2091.39	2059.22	2066.1	2066.47	2104.49	2014.26	2116.49	2121.67	2108.71	2119.91	2105.52	2047.97	2050.58	2077.8	2109.43	2074.88	2105.27	2073.95	2073.09	2053.37	2071.06	2060.77	2062.75	2068.37	2056.25	2094.38	2107.26	2068.2	2067.54	2045.35	2083.65	2127.47	2090.29	1983.74	2120.11	0	2083.08	2104.94	2061.78	2062.47	2081.18	2005.8	2092.26	2111.22	2078.7	2040.26	2099.02	2103.18
RISE395	2057.48	2098.98	2080.7	2088.79	2091.66	2127.56	2024.23	2124.55	2128.38	2109	2127.48	2102.75	2073.37	2063.57	2066.1	2103.27	2068.9	2099.47	2066.15	2052.62	2073.72	2065.51	2069.6	2071.96	2101.94	2070.68	2084.75	2111.64	2066.45	2058.97	2079.35	2075.35	2121.55	2125.41	2010.72	2140.65	2116.66	0	2098.28	2101.75	2096.7	2142.3	2021.05	2156.48	2131.68	2103.69	2067.7	2177.53	2148.57
RISE47_NordicBronzeAge9	2069.43	2070.18	2082.47	2097.9	2085.39	2188.89	2030.86	2103.48	2077.6	2094.38	2098.56	2155.13	2115.86	2071.81	2092.95	2129.93	2072.33	2144.94	2074.51	2093.94	2085.81	2092.7	2087.1	2075.69	2014.96	2084.7	2132.29	2154.99	2082.58	2085.47	2099.25	2094.71	2133.75	2083.8	1989.35	2079.69	2102.31	2064.75	0	2041.92	2030.29	2047.25	1981.92	2080.21	2069.62	2044.61	1980.93	2069.69	2081.51
RISE493	2001.83	2094.57	1996.93	2024.59	2034.91	2072.69	2034.21	2076.71	2080.49	2063.13	2078.92	2050.48	2007.84	2006.15	1994.22	2107.24	2030.81	2045.14	2006.58	2004.2	2007.65	2002.56	2022.4	2038.12	2085.16	2006	2066.83	2036.11	2009.75	2013.79	2019.03	2025.29	2131.64	2075.01	1950	2085.41	2087.82	2099.3	2074.41	0	2274.85	2171.99	2437.66	2198.5	2137.09	2234.87	2308.01	2137.42	2166.88
RISE495	1996.18	2100.05	1982.86	2013.55	2033.34	2074.92	2034.28	2075.02	2060.23	2072.15	2077.23	2043.92	2007.82	2006.24	2011.65	2072.96	2007.71	2055.75	2010.17	2012.97	2005.1	2012.18	2002.4	2023.43	2068.6	2004.13	2070.83	2056.09	2023.09	2004.52	2013.09	2031.45	2111.11	2085.39	1943.72	2090.61	2089.88	2090.4	2056.23	2267.79	0	2200.48	2505.81	2192.43	2129.16	2222.93	2313.79	2137.11	2136.16
RISE496	2028.11	2089.15	2007.55	2027.2	2036.32	2081.19	2016.08	2084.75	2097.27	2087.89	2098.23	2090.7	2038.25	1996.6	2022.81	2079.4	2013.97	2064.34	2026.84	2034.07	2030.31	2020.22	2016.44	2045.95	2084.66	2011.64	2056.54	2063.65	2024.91	2009.71	2032.65	2044.24	2104.01	2101.48	1959.69	2110.84	2093.32	2113.63	2058.74	2153.18	2181.2	0	2204.77	2168.45	2164.63	2181.2	2165.86	2153.98	2138.72
RISE497	2015.22	2128.7	1991.99	2028.68	2019.6	2051.66	2051.58	2078.02	2064.86	2057.6	2070.86	2041.73	2000.83	2013.59	2014.84	2076.49	2022.45	2029.5	2014.76	2008.55	2004.7	2012.59	2011.15	2013.29	2074.03	2003.63	2071.46	2036.88	2020.43	1985.12	2002.36	2047.42	2117.59	2076.54	1946.48	2084.78	2096.24	2066.56	2058.57	2504.48	2585.96	2291.14	0	2240.63	2134.31	2366.99	2650.63	2136.07	2159.08
RISE499	2016.41	2113.8	2023.88	2026.04	2029.02	2080.56	2017.11	2067.13	2094.08	2077.29	2091.14	2078.95	2017.26	2015.96	2033.4	2084.32	2035.88	2070.91	2026.73	2017.18	2016.54	2024.45	2017.83	2034.03	2081.19	2000.38	2066.49	2069.12	2032.85	2026.83	2035.97	2051.33	2110.7	2089.98	1952.43	2109.79	2102.38	2122.99	2085.99	2165.59	2166.33	2166.65	2150.8	0	2134.71	2197.69	2149.54	2128.8	2162.97
RISE500	2021.54	2087.87	2030.14	2041.36	2052.94	2086.89	2008.67	2104.94	2074.57	2082.72	2109.42	2071.3	2047.39	2045.28	2039.16	2089.2	2028.71	2062.91	2031.04	2048.08	2031.31	2051.06	2033.43	2049.41	2057.62	2038.81	2061.8	2058.68	2051	2042.56	2040.5	2062.29	2095.49	2089.76	1958.44	2113.61	2107.85	2088.87	2065.19	2103.65	2096.67	2147.07	2035.88	2122.05	0	2119.2	2057.19	2134.6	2131.6
RISE502	1997.38	2104.35	2008.15	2021.64	2010.74	2070.36	2029.14	2081.24	2061.68	2058.02	2045.71	2043.92	1993.82	2010.16	2019.42	2068.04	2030.47	2061.74	2022.56	2026.19	2009.73	2019.78	2030.86	2007.8	2064.1	1999.17	2032.41	2051.73	2029.78	2007.13	2015.27	2025.56	2084.77	2085.27	1943.17	2079.2	2094.91	2084.51	2063.12	2222.38	2213.06	2183.77	2283.91	2209.33	2136.93	0	2232.57	2125.81	2129.89
RISE504	2010.71	2126.17	2020.91	2048.16	2027.1	2054.37	2062.37	2067.17	2057.37	2065.23	2076.97	2052.63	2024.4	2015.53	2033.37	2082.94	2026.85	2061.89	2027.68	2021.15	2016.9	2036.08	2023.54	2024.54	2098.55	2033.02	2085.23	2051.23	2039.15	2008.18	2009.8	2055.87	2094.27	2067.43	1964.6	2095.91	2102.67	2088.1	2035.87	2329.06	2345.57	2224.95	2616.06	2211.02	2120.72	2285.52	0	2119.97	2154.09
RISE505	2039.38	2112.32	2025.62	2048.58	2052.81	2091.61	2014.35	2107.76	2098.8	2099.8	2110.84	2062.94	2038.57	2042.71	2029.79	2093.94	2015.85	2090.77	2018.56	2035.62	2050.84	2031.21	2026.83	2037.33	2096.75	2027.47	2069.37	2082.62	2042.35	2018.24	2036.39	2059.37	2107.87	2113.6	1972.88	2113.73	2099.47	2146.34	2064.37	2098.57	2108.43	2140.83	2045.11	2124.27	2138.85	2114.21	2063.2	0	2149.96
RISE511	2008.69	2094.12	1993.01	1987.67	2016.37	2083.64	1998.48	2088.82	2115.26	2092.22	2105.08	2072.86	1998.97	2003.38	2006.46	2105.71	2001.74	2045.76	2008.38	1997.08	1999.47	2002.82	1987.26	2006.72	2146.42	1992.73	2047.1	2057.84	2006.62	2002.24	2015.16	2032.14	2135.15	2106.72	1926.85	2134.44	2104.15	2110.93	2086.2	2136.48	2106.94	2129.1	2069.89	2161.58	2135.45	2116.53	2093.51	2148.35	0
RISE523	2028.04	2065.72	2017.32	2017.18	2012.32	2075	2025.18	2064.46	2069.27	2075.74	2098.18	2052.86	2012.29	2004.76	2040.78	2067.61	2005.48	2060.47	2017.33	2024.6	2022.81	2009.79	2026.15	2022.15	2064.91	2012.8	2054.81	2063.31	2043.75	2011.89	2021.78	2039.45	2112.96	2098.42	1937.91	2118.44	2087.74	2111.99	2066.63	2123.01	2123.51	2121.36	2118.23	2138.05	2120.46	2127.87	2108.51	2152.59	2133.51
RISE548	2014.75	2112.63	1988.73	2009.42	2013.55	2084.67	2012.36	2098.29	2096.79	2098.53	2108.12	2069.44	1998.16	1981.91	1979.5	2088.06	1997.3	2054.5	1990.41	2006.4	2008.84	1989.36	2003.55	1994.26	2131.72	2001.06	2043.41	2036.7	2008.66	2001.32	2006.05	2037.66	2135.46	2111.26	1940.77	2123.27	2101.17	2112.6	2061.08	2093.04	2087.42	2144.52	2027.35	2127.12	2136.5	2126.64	2080.06	2149.28	2246.77
RISE552	1997.07	2091.76	1993.53	2013.85	2000.58	2058.15	2013.11	2094.97	2093.46	2099.54	2108.22	2065.92	1985.9	1985.33	1994.28	2076.82	1977.04	2042.7	2003.26	1999.02	2006.93	1988.33	1994.59	2001.35	2150.02	2014.07	2034.95	2027.49	1990.59	1990.31	1980.05	2017.56	2108.45	2124.1	1923.19	2096.6	2078.97	2096.3	2071.15	2099.58	2084.56	2113.29	2047.4	2118.15	2119.79	2128.39	2074.24	2128.76	2246.94
RISE569	2093.42	2081.13	2075.67	2090.54	2083.33	2107.67	2064.05	2113.42	2086.86	2101.29	2110.13	2120.75	2086.63	2065	2065.77	2107.09	2070.32	2084.12	2091.79	2061.24	2084.91	2059.11	2072.71	2077.95	2071.74	2081.41	2070.15	2072.27	2088.51	2065.27	2079.63	2112.52	2125.27	2105.32	1998.63	2107.15	2123.02	2074.43	2110.18	2074.3	2066.56	2083.77	2012.67	2085.18	2101.94	2062.09	2037.82	2092.15	2096.3
RISE577	2043.23	2058.76	2042.94	2051.1	2055.21	2071.52	2030.03	2067.7	2088.72	2095	2078.39	2067.56	2049.74	2071.28	2061.94	2107.95	2040.7	2078.96	2044.24	2061.39	2043.21	2047.35	2062.08	2075.65	2078.41	2035.17	2054.86	2080.87	2071.82	2054.91	2040.89	2078.15	2106.16	2102.94	1968.33	2109.76	2099.3	2065.23	2069.06	2057.59	2050.92	2057.45	1976.23	2061.8	2094.45	2081.36	2020.68	2102.96	2121.5
RISE601	2004.72	2126.81	2018.66	2020.2	2040.61	2053.12	2055.14	2096.11	2098.28	2095.31	2101.24	2066.5	2006.27	2035.12	2015.81	2093.48	2023.45	2052.84	2009.81	2032.98	2032.02	2022.58	2014.41	2018.16	2096.01	2007.87	2054.59	2049.89	2036.58	2017.3	2037.85	2034.4	2105.21	2094.94	1957.27	2086	2079.91	2088.68	2076.69	2246.08	2269.16	2200.65	2459.86	2191.45	2108.59	2238.8	2324.59	2149.95	2162.27
RISE602	2017.98	2124.51	2031.67	2045.62	2050.58	2074.41	2057.03	2075.77	2080.94	2067.38	2094.03	2064.43	2028.57	2034.93	2030.14	2102.6	2010.23	2061.64	2031.99	2026.39	2036.86	2051.64	2042.66	2021.95	2124.05	2034.41	2071.52	2058.3	2038.18	2027.17	2033.11	2063.76	2125.86	2087.65	1979.2	2115.44	2107.82	2117.6	2053.55	2231.84	2272.28	2166.04	2423.5	2186.8	2130.32	2204.91	2331.75	2138.53	2177.6
RISE98	2043.65	2077.43	2046.75	2054.46	2052.18	2100.55	2007.83	2091.78	2083.31	2094.51	2090.4	2073.73	2051.6	2025.08	2048.22	2087.48	2048.7	2109.26	2046.87	2041.21	2044.7	2053.4	2050.71	2036.81	2058.62	2032.24	2073.26	2108.58	2053.44	2042.09	2033.75	2047.49	2104.69	2114.94	1982	2107.31	2083.86	2064.81	2080.77	2052.45	2035.25	2078.04	1986.08	2072.42	2107.12	2047.48	1994.1	2096.33	2097.28
RM127_Early_Bronze_Age	2044.41	2046.14	2034.65	2041.48	2049.19	2086.73	2025.46	2096.24	2117.76	2076.77	2092.81	2068.67	2030.57	2051.08	2048.7	2066.22	2039.34	2071.9	2049.96	2025.23	2055.78	2048.05	2037.4	2066.8	2069.14	2038.08	2058.35	2075.22	2035.36	2052.84	2040.3	2051.97	2086.1	2100.55	1950.01	2108.35	2090.37	2095.9	2067.47	2032.25	2030.51	2077.39	1980.11	2068.76	2082.41	2038.01	2000.02	2093.34	2092.75
RSK1_Early_Bronze_Age	2039.43	2063.1	2052.74	2069.95	2063.74	2101.5	2028.34	2092.4	2081.79	2089.31	2090.45	2054.91	2051.46	2052.62	2064.87	2057.19	2064.53	2081.27	2090.32	2059.93	2056.23	2057.61	2077.22	2070.34	2050.03	2058.92	2057.34	2082.73	2060.07	2053.18	2062.65	2062.55	2091.64	2098.63	1980.72	2105.07	2079.97	2089.04	2067.31	2015.93	2047.57	2075.44	1995.29	2052.31	2098.77	2050.11	1996.03	2077.48	2101.09
SATP	2032.4	2079.06	2005.35	2028.58	2025.42	1972.86	2054.79	2065.69	2087.31	2060.67	2064.26	2058.87	1987.54	2024.69	2025.84	1999.04	2000.74	1971.89	2032.72	2009.4	2011.63	2021.12	1994.56	1996.19	2597.48	2043.23	1976.45	1965.01	2022.3	2009.95	1997.58	2021.15	1974.3	2073.27	1953.84	2078.84	2073.55	2038.03	2038.26	2046.92	2047.27	2076.4	2041.41	2074.88	2092.91	2065.25	2058.93	2084.82	2130.6
TV32032extra_Bronze	2107.74	2058.99	2100.47	2116.74	2109.1	2093.82	2076.54	2085.76	2082.99	2090.55	2082.07	2078.87	2151.33	2142.97	2153.32	2055.22	2116.66	2100.4	2139.89	2137.45	2132.63	2120.54	2140.5	2110.97	2017	2089.31	2093.32	2111.86	2140.44	2146.02	2117.2	2123.98	2068.32	2092.23	2027.43	2074.5	2072.87	2044.28	2086.38	2010.61	2006.23	2026.33	1950.88	2029.91	2056.67	2033.14	1987.13	2075.44	2040.8
TV3831_Bronze	2090.79	2038.96	2105.46	2101.03	2107.51	2093.26	2059.96	2058.84	2067.4	2090.3	2076.54	2071.99	2114.05	2122.31	2125.06	2066.7	2106.34	2089.97	2107.19	2126.84	2128.09	2148.72	2111.59	2107.86	2022.99	2085.17	2078.09	2096.94	2147.17	2145.38	2138.01	2106.07	2065.68	2072.06	2022.92	2063.4	2067.32	2052.45	2065.59	1995.99	2018.99	2043.65	1953.33	2037.99	2067.71	2015.35	1994.21	2048.97	2038.73
Bar31_AnatolianNeolithic	2157.2	2051.32	2172.46	2166.3	2158.89	2007.33	2088.13	2074.44	2047.99	2080.7	2050.01	2082.42	2100.1	2123.21	2124.28	2020.39	2117.29	1984.45	2161.19	2133.34	2134.98	2108.72	2133.44	2127.74	2060.24	2164.8	1969.79	1965.8	2134.82	2111.96	2134.14	2100.27	1972.29	2058.88	2044.46	2041.08	2041.76	2042.71	2057.33	1979.98	1982.07	2018.53	1929.38	2007.74	2028.95	1985.2	1958.33	2023.78	2001.31
Bar8_AnatolianNeolithic	2164.03	2042.13	2183.01	2156.45	2138.67	2009.91	2086.48	2085.46	2059.69	2070.13	2058.46	2080.67	2117.04	2121.25	2131.57	2040.39	2132.88	1973.66	2170.19	2105.42	2129.68	2104.57	2117.62	2137.62	2039.97	2162.14	1977.95	1984.68	2132.13	2124.23	2131.85	2104.23	1997.55	2087.45	2063.28	2066.71	2064.05	2046.92	2073.32	1984.27	1993.72	2013.29	1927.86	2024.02	2038.49	1995.64	1959.89	2026.13	1997.21
Klei10_LateNeolithic	2170	2043.53	2165.82	2179.5	2157.13	2000.12	2089.97	2057.33	2050.03	2058.36	2066.42	2089.9	2129.01	2127.45	2125.77	2008.56	2117.33	1975.52	2170.77	2143.09	2138.15	2111.59	2128.7	2139.8	2034.65	2161.31	1966.17	1967.74	2122.36	2130.25	2112.86	2100.41	1987.66	2057.72	2045.93	2024.51	2038.76	2017.58	2073.6	1989.01	1973.4	2020.79	1919.83	1993.47	2034.38	2008.65	1952.22	2016.95	1997.82
Pal7_LateNeolithic	2163.97	2046.38	2188.49	2182.64	2153.86	1995.44	2097.17	2065.97	2061.25	2083.55	2066.94	2081.22	2105.02	2121.23	2128.85	2007.52	2125.25	1975.15	2157.06	2142.78	2116.56	2153.21	2127.68	2123.65	2047.17	2197.45	1977.29	1980.16	2118.26	2137.43	2121.03	2084.63	1994.64	2077.11	2051.46	2061.05	2056.06	2037.09	2057.17	1986.05	1981.79	2021.21	1940.56	2023.25	2058.24	1996.63	1963.02	2024.25	2000.57
Rev5_EarlyNeolithic	2174.15	2047.76	2206.95	2162	2159.97	1997.13	2086.47	2071.74	2048.62	2064.11	2056.98	2069.86	2124.83	2142.02	2138.54	2028.66	2146.36	1972.31	2177.35	2158.54	2127.11	2122.2	2139.38	2135.08	2014.34	2176.37	1968.97	1963.26	2114.93	2149.41	2124.57	2108.63	1990.5	2050.12	2096.52	2042.29	2065.09	2018.17	2052.14	1961.19	1953.57	2004.05	1929.82	1996.94	2031.37	1983.4	1950.29	2018.91	1969.98
[truncated: 18 more columns]
